# Supplementary material
Source: PubMed Central journal article supplement (PMC4388755)

**Epidermal SIRT1 loss disrupts skin barrier integrity and sensitizes mice to epicutaneous allergen challenge**

Mei Ming, Baozhong Zhao, Christopher R. Shea, Palak Shah, Lei Qiang, Steven R. White, Diane M. Sims, and Yu-Ying He

**Supplemental Information:**

**Supplemental Tables: Table S1: related to Figures 2 and 5**

**Supplemental Figures: Fig. S1-S2**

**Fig. S1, related to Fig. 1**

**Fig. S2, related to Fig. 2**

**Fig. S3, related to Fig. 6**

**Supplemental Table S1: related to Figures 2 and 5**

**Table S1:** Genes that are up- or down-regulated in siSIRT1 NHEK cells as compared with NC control cells by greater than two fold.

| <b>Genes</b>                                | <b>Fold (siSIRT1/NC)</b> |
|---------------------------------------------|--------------------------|
| Ribosomal protein L4 (RPL4)                 | 0.33                     |
| Filaggrin                                   | 0.41                     |
| Glycoprotein (transmembrane) nmb (GPNMB)    | 0.44                     |
| Cyclin-dependent kinase inhibitor 1C (p57)  | 0.46                     |
| Lymphocyte antigen 6 complex, locus D (E48) | 0.46                     |
| MDC1                                        | 0.46                     |
| CYP1B1                                      | 0.48                     |
| Lymphocyte antigen (HLA-G3)                 | 0.49                     |
| Cyclin L1 (CCNL1)                           | 2.73                     |

### Supplemental Figures: legends

**Fig. S1, related to Figure 1. SIRT1 protein level and activity in skin from SIRT1 WT, cHet, and cKO mice.** A-B, Immunoblot analysis of SIRT1 and GAPDH in skin (A) and liver (B) from WT, cHet and cKO mice at 4-6 weeks of age. The upper band in the SIRT1 blot in A shows the wild-type SIRT1 protein (SIRT1), whereas the lower band shows the nonfunctional truncated protein results from the excision of the conserved Sir2 motif of the SIRT1 catalytic domain ( $\Delta$ SIRT1). C, Fluorometric assay of SIRT1 activity in the skin from WT, cHet, and cKO mice (n =3) at 4-6 weeks of age. From *Ming M, Soltani K, Shea CR, Li X, He YY. Dual role of SIRT1 in UVB-induced skin tumorigenesis. Oncogene. 2014;doi: 10.1038/onc.2013.583. [Epub ahead of print]. PMID: PMC3465498.*

**Fig. S2, related to Figure 2. Effect of SIRT1 knockdown in the mRNA levels of epidermal differentiation genes,** filaggrin, involucrin, keratin 14, keratin 5, desmoglein 1, desmoglein 2, desmoglein 3, KLK5, KLK7, KLK8, KLK10, KLK11, KLK12, KLK13, matriptase, and SPINK5.

**Fig. S3, related to Figure 6. Role of AKT in AhR regulation of filaggrin.** A, Immunoblot analysis of filaggrin, CYP1B1, p-AKT, AKT, and GAPDH in HaCaT cells treated with BaP (10  $\mu$ M) for 48h. B, Immunoblot analysis of filaggrin, p-AKT, AKT, CYP1B1, and GAPDH in HaCaT cells treated with vehicle (V), BaP (10  $\mu$ M), LY (10  $\mu$ M), or the combination of BaP and LY. C, Immunoblot analysis of filaggrin, p-AKT, AKT, CYP1B1, and GAPDH in HaCaT cells transfected with siRNA targeting AKT1 (siAKT1) or negative control (NC) and then treated with vehicle (V) or BaP (10  $\mu$ M).

**Ming *et al* Supplemental Figure S1: related to Figure 1**

From Ming M, Soltani K, Shea CR, Li X, He YY. Dual role of SIRT1 in UVB-induced skin tumorigenesis. *Oncogene*, In press, 2014. PMID: PMC3465498.

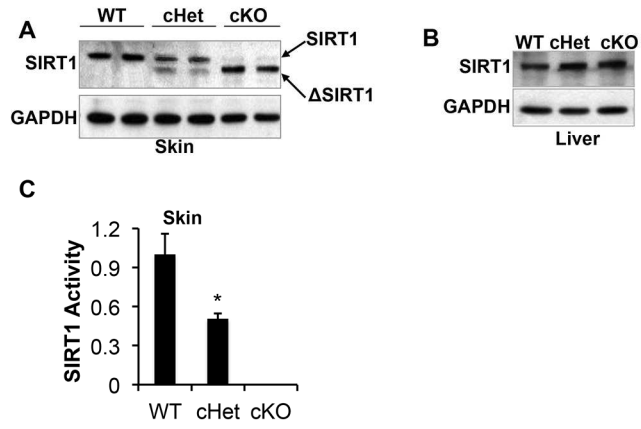

Ming et al/ Supplemental Figure S2: related to Figure 2

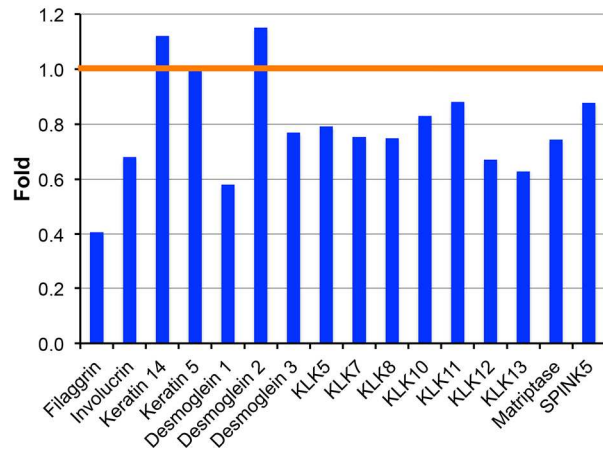

Ming *et al* Supplemental Figure S3: related to Figure 6

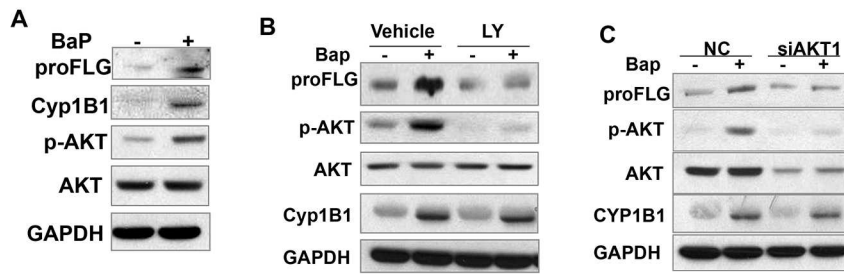

Supplement: NIHMS632892-supplement-supplement_1.pdf [file NIHMS632892-supplement-supplement_1.pdf]
